# Supplementary material for: Defining Patterns and Rates of Natural vs. Drought Driven Aquatic Community Variability Indicates the Ongoing Need for Long Term Ecological Research
Source: MDPI journal article supplement (doi:10.3390/biology12040590), 2023-04-12
Supplement: s1 [file s1]

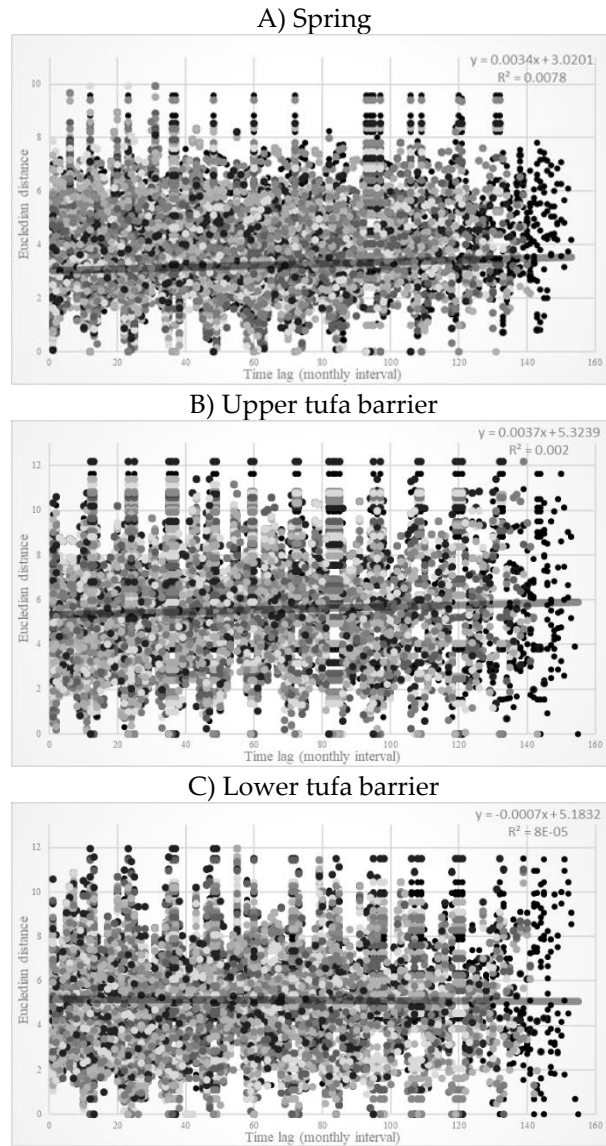

**Figure S1.** Euclidian distance triangular resemblance matrix of dipteran communities over time regression with monthly time-lags (points represent communities compared among themselves with increasing time steps). Plot shows seasonal, non-directional dipteran community dynamics with 18 aquatic true fly families over 156 time steps (12 months  $\times$  13 years) for three longitudinally connected sites: **(A)** Spring (IBR = Spring of Bijela Rijeka River), **(B)** Upper (upstream) tufa barrier (BL = Tufa barrier Labudovac), **(C)** Lower (downstream) tufa barrier (BKM = Tufa barrier Kozjak-Milanovac). Different shades of grey are plotted for visualization purposes only. .
