# Supplementary material for: Defining Patterns and Rates of Natural vs. Drought Driven Aquatic Community Variability Indicates the Ongoing Need for Long Term Ecological Research
Source: Biology (Basel). 2023 Apr 12;12(4):590. doi: 10.3390/biology12040590 (PMC10136097; doi:10.3390/biology12040590)
Supplement: Supplementary file 1 [file biology-12-00590-s001.zip › SuppInfo_Diptera_Abundance-1.xlsx]

## Sheet: SuppInfo_IBR
Year_Month/Family/Water properties	Athericidae	Ceratopogonidae	Chironomidae	Dixidae	Empididae	Ephydridae	Limoniidae	Muscidae	Pediciidae	Psychodidae	Scatophagidae	Sciomyizidae	Simuliidae	Stratiomyidae	Syrphidae	Tabanidae	Tipulidae	Discharge (Q; m3 s-1)	Water temperature (T; °C)		The Shapiro-Wilk tests showed a significance departure from the normality, W(156) = .874, p < .001												Effect	Univariate Tests of Significance for Discharge (Spreadsheet1) Sigma-restricted parameterization Effective hypothesis decomposition; Std. Error of Estimate: 0,5399
2007_I																		0.45	7.9	Discharge (Q; m3 s-1)									Discharge	Discharge Predicted				SS	Degr. of	MS	F	p
2007_II																		0.498	7.9		P-value	3.262e-10							0.45	0.65278			Intercept	39.2472	1	39.2472	134.629	0
2007_III		1	29															0.404	7.1		W	0.874							0.498	0.745011			Month	2.27185	1	2.27185	7.79311	0.00596704
2007_IV		3	141		32		3	1										0.361	8		Sample size (n)	156							0.404	1.05263			Year	22.7727	12	1.89772	6.50973	3.61378e-09
2007_V		2	386	5	57		3			19								0.243	8.5		Average (x̄)	0.8421							0.361	1.00416			Error	41.396	142	0.291521
2007_VI		7	987	3	3		2	1		33								0.28	8.5		Median	0.6175							0.243	1.07263
2007_VII		10	1707		4	18	1			73						1		0.143	9.9		Sample Standard Deviation (S)	0.6547							0.28	0.571857
2007_VIII		6	376	3	7	2		1	37	66								0.174	9.7		Sum of Squares	66.4405							0.143	0.364088
2007_IX			174	11	3	1	9	1	7	9					3			0.404	8.1		b	7.6201							0.174	0.166473
2007_X			159	4			13		1									0.89	8.7		Skewness	1.2293							0.404	0.442242			Month	2,27	1	2272	7793	,006*
2007_XI			54	5			2											0.954	7.4										0.89	0.482549			Year	22,77	12	1898	6510	,000*
2007_XII			21				2											0.498	7.5		The Shapiro-Wilk tests showed a significance departure from the normality, W(156) = .946, p < .001								0.954	0.602473
2008_I			19															0.709	7.7	Water temperature (T; °C)									0.498	0.744703
2008_II			12						1									0.45	7.8		P-value	1.023e-05							0.709	0.683394
2008_III		4	250						3									0.498	8.5		W	0.9458							0.45	0.775625
2008_IV			124	1	1				5			1						0.828	8		Sample size (n)	156							0.498	1.08324
2008_V		10	579	1	3		1		4	1			1					0.653	8.7		Average (x̄)	7.8782							0.828	1.03478
2008_VI		31	563						1	63								0.548	8.9		Median	7.8							0.653	1.10324
2008_VII		29	1486			3	4		1	70		1						0.404	8.2		Sample Standard Deviation (S)	0.4691							0.548	0.602471
2008_VIII		5	1215			7	1	2	1	24			4					0.404	8.2		Sum of Squares	34.1059							0.404	0.394701
2008_IX		4	152	3		1	3			6								0.498	7.5		b	5.6796							0.404	0.197086
2008_X		5	111				1		1	1			1					0.498	7.4		Skewness	1.0141							0.498	0.472855
2008_XI			68						2									0.709	7.3										0.498	0.513163
2008_XII			23									1						0.89	7.2										0.709	0.633086
2009_I																		1.06	7.2										0.89	0.775317
2009_II																		1.7	7.2										1.06	0.714007
2009_III			56						6									1.16	7.2										1.7	0.806238
2009_IV			258		8				3									1.37	7.9										1.16	1.11385
2009_V			509		16			1		2								0.963	8.1										1.37	1.06539
2009_VI		3	514		7					21			5					0.444	8.3										0.963	1.13385
2009_VII		1	492		3			1		21								0.355	8.3										0.444	0.633084
2009_VIII			153	1	6		2	1		7								0.209	8.7										0.355	0.425315
2009_IX			191		3	1	2			3								0.106	7.8										0.209	0.2277
2009_X		1	156				3		2	1								0.152	7.7										0.106	0.503469
2009_XI			204		1		6						1					0.209	6.8										0.152	0.543777
2009_XII					1		1											1.94	7.3										0.209	0.6637
2010_I																		1.76	7.5										1.94	0.80593
2010_II			4															1.04	7.5										1.76	0.744621
2010_III			49						2									1.64	8.1										1.04	0.836852
2010_IV			97		41				1									1.54	8.4										1.64	1.14447
2010_V			112		43			1	1	3								1.13	7.7										1.54	1.09601
2010_VI			325		2					67			5					1.33	8.7										1.13	1.16447
2010_VII		1	374		3	3				14		1	2					0.612	8										1.33	0.663698
2010_VIII			133	4	5	1	12		2	4		1						0.397	8										0.612	0.455929
2010_IX		1	70	8	1		14		1	1								0.694	7.9										0.397	0.258313
2010_X			33	1		1			3									0.535	7.8										0.694	0.534082
2010_XI			27			1			2									0.86	7.8										0.535	0.57439
2010_XII																		1.23	7.8										0.86	0.694313
2011_I			10															0.798	7.8										1.23	0.836544
2011_II			245		1				2									0.652	7.8										0.798	0.775234
2011_III																		0.798	7.8										0.652	0.867465
2011_IV		1	381	7	3				4									0.583	8										0.798	1.17508
2011_V		1	172		16		3	1	3	20								0.518	8.2										0.583	1.12662
2011_VI		4	370		4		13		1	31			2					0.455	7.7										0.518	1.19508
2011_VII		4	375		5		4		2	15								0.285	8.5										0.455	0.694311
2011_VIII			161	6	2		22		1	9					1			0.285	8.4										0.285	0.486542
2011_IX		1	65	6	1		2								4			0.141	8.6										0.285	0.288927				1	2	3	4	5	6	7	8	9	10	11	12	13
2011_X			125	9			2		2									0.285	8										0.141	0.564696				2007	2008	2009	2010	2011	2012	2013	2014	2015	2016	2017	2018	2019
2011_XI			48	2														0.061	7.6										0.285	0.605004
2011_XII																		0.395	7.6										0.061	0.724927
2012_I			8				4											0.1	7.6										0.395	0.867158
2012_II																		0.036	7.2										0.1	0.805848
2012_III																		0.148	7.2										0.036	0.898079
2012_IV																		0.437	7.3										0.148	1.20569
2012_V			49	1	66		1	1		7								0.437	8.2										0.437	1.15723
2012_VI			99		5					9			1					0.214	8.1										0.437	1.22569
2012_VII		2	331		2			1	1	41			1					0.178	8										0.214	0.724925
2012_VIII		2	194		6		3		1	40					3			0.122	8										0.178	0.517156
2012_IX			100	2	2					2					1			0.437	8.5										0.122	0.31954
2012_X			73	2	1				4									0.178	7.4										0.437	0.59531
2012_XI			12															0.598	7.4										0.178	0.635617
2012_XII			13															1.05	7.4										0.598	0.75554
2013_I			21															1.51	7.9										1.05	0.897771
2013_II			51															0.931	7.9										1.51	0.836462
2013_III			6						2									1.72	7.9										0.931	0.928692
2013_IV			87		6				2									1.94	7.9										1.72	1.23631
2013_V		2	121		2			1	3									1.51	8										1.94	1.18785
2013_VI		11	127		11		2			62								0.842	7.9										1.51	1.25631
2013_VII		1	399		5			1	2	39			2	1				0.669	9										0.842	0.755538
2013_VIII			66	1	1		11											0.505	8.3										0.669	0.547769
2013_IX			49	2	1								1					0.348	8.2										0.505	0.350154
2013_X			12				4		1									0.203	7.6										0.348	0.625923
2013_XI			15															0.755	7.6										0.203	0.666231
2013_XII			49															0.586	7.6										0.755	0.786154
2014_I																		0.334	7.7										0.586	0.928385
2014_II			93				1											2.07	7.5										0.334	0.867075
2014_III			39						1									1.96	7.7										2.07	0.959306
2014_IV			71		7				6									1.75	7.7										1.96	1.26692
2014_V			59		13				1									2.71	7.7										1.75	1.21846
2014_VI	1		527		5	2			1	21			2			1		1.54	8.3										2.71	1.28692
2014_VII			429		4	1	1			66								2.07	8										1.54	0.786152
2014_VIII			189	2						6			2					0.861	8.4										2.07	0.578383
2014_IX		1	20	1				1	1									2.93	8.1										0.861	0.380767
2014_X			17															3.14	8										2.93	0.656537
2014_XI			29															1.64	7.5										3.14	0.696844
2014_XII			53															1.43	7.6										1.64	0.816767
2015_I																		1.54	7.5										1.43	0.958998
2015_II			65															1.04	7.5										1.54	0.897689
2015_III			80															2.34	7.7										1.04	0.989919
2015_IV			217		21				1									2.34	7.8										2.34	1.29753
2015_V		3	194		5					26								1.97	8.2										2.34	1.24907
2015_VI		5	578		4		4	1		71								0.623	8.2										1.97	1.31753
2015_VII		8	314		3		1			9								0.328	8.1										0.623	0.816766
2015_VIII		6	115	4	2		26			3							1	0.222	7.8										0.328	0.608996
2015_IX			47	7	1		9		1	1								0.475	8										0.222	0.411381
2015_X			51	5	1				2				1					1.65	7.6										0.475	0.68715
2015_XI			37										3					0.475	7.3										1.65	0.727458
2015_XII			25															0.362	7.3										0.475	0.847381
2016_I																		0.52	7.3										0.362	0.989612
2016_II			24				1											1.28	7.6										0.52	0.928302
2016_III			23						1									1.81	7.5										1.28	1.02053
2016_IV			150		11								1					1.22	7.8										1.81	1.32815
2016_V			295		9				2	55			10					1.81	7.9										1.22	1.27969
2016_VI		3	688		3			1		79			5					0.847	7.9										1.81	1.34815
2016_VII			580		6	1				43	4	2						0.52	7.9										0.847	0.847379
2016_VIII			208	9	2		21	1	1	7			2					0.367	7.8										0.52	0.63961
2016_IX			73	13			8						3				1	0.801	7.8										0.367	0.441995
2016_X			79	3	1		1		2				3				1	0.342	7.5										0.801	0.717764
2016_XI			102															1.96	7.5										0.342	0.758071
2016_XII																		0.555	7.4										1.96	0.877995
2017_I																		0.438	7.4										0.555	1.02023
2017_II			131															0.713	7.4										0.438	0.958916
2017_III			208						1									1.4	7.4										0.713	1.05115
2017_IV			113	2	7		1		3	1			1					0.713	7.7										1.4	1.35876
2017_V		2	413	2	23			1		11			3					0.628	8										0.713	1.3103
2017_VI		10	805	4	25	1	20		1	47			18			1	1	0.438	7.9										0.628	1.37876
2017_VII		13	471	1	9		9		2	53	1		1					0.342	8.1										0.438	0.877993
2017_VIII			191	9	3		5		1	21		2			1			0.212	7.9										0.342	0.670223
2017_IX			60	12			1			1								0.801	8.1										0.212	0.472608
2017_X			123	8	1				2				3					0.286	7.9										0.801	0.748377
2017_XI			154						4				2					0.713	7.4										0.286	0.788685
2017_XII			45															1.96	7.4										0.713	0.908608
2018_I			27															1.43	7.7										1.96	1.05084
2018_II																		0.991	7.7										1.43	0.989529
2018_III			78						1									1.89	7.8										0.991	1.08176
2018_IV			260		11				2				5					1.89	8.2										1.89	1.38938
2018_V			554		11		3		1	125			11				3	1.04	8.6										1.89	1.34091
2018_VI			466		6		3		2	82			5					0.991	8.1										1.04	1.40938
2018_VII		5	269	5	4		2		1	16			1					0.627	8.5										0.991	0.908606
2018_VIII			85	4	1		3			5								0.395	8.8										0.627	0.700837
2018_IX			53	2			3			1			2					0.299	8.3										0.395	0.503222
2018_X			88	1	2								8					0.299	7.8										0.299	0.778991
2018_XI			39										2					0.432	8.1										0.299	0.819299
2018_XII			43				1											0.221	7.5										0.432	0.939222
2019_I																		0.225	7.4										0.221	1.08145
2019_II			379															0.672	7.4										0.225	1.02014
2019_III			210		1													0.304	7.3										0.672	1.11237
2019_IV			218	6	13						2	1	1					0.47	7.2										0.304	1.41999
2019_V			47		7				1	1	1							2.72	8.5										0.47	1.37153
2019_VI		8	139				5	1		32			1					1.27	8.1										2.72	1.43999
2019_VII		17	1123		8	1	12		1	97	2		2					0.588	8										1.27	0.93922
2019_VIII		1	179		1		7	1		20			1					0.399	8.3										0.588	0.731451
2019_IX			91	13	1		7			2			1				2	0.203	8.4										0.399	0.533835
2019_X			65	5			2						2				1	0.203	7.6										0.203	0.809604
2019_XI			70										1					0.854	8										0.203	0.849912
2019_XII			47															0.952	7.6										0.854	0.969835
																													0.952	1.11207

## Sheet: SuppInfo_BL
Year_Month/Family/Water properties	Athericidae	Ceratopogonidae	Chironomidae	Dixidae	Empididae	Limoniidae	Muscidae	Psychodidae	Sciomyzidae	Simuliidae	Stratiomyidae	Syrphidae	Tipulidae	Discharge (Q; m3 s-1)	Water temperature (T; °C)	Discharge (Q; m3 s-1)		The Shapiro-Wilk tests showed a significance departure from the normality, W(156) = .879, p < .001
2007_I														1.63253	3.658		P-value	5.531e-10									Discharge	Discharge Predicted			Effect	Univariate Tests of Significance for Discharge (Spreadsheet1) Sigma-restricted parameterization Effective hypothesis decomposition; Std. Error of Estimate: 1,3161																Effect	Collinearity statistics for terms in the equation (GLMM protok IBR) Sigma-restricted parameterization
2007_II														1.81692	3.56558		W	0.8785									1.63253	2.0261				SS	Degr. of	MS	F	p													Level of
2007_III			24							8				2.14061	6.53		Sample size (n)	156									1.81692	2.5212			Intercept	298.297	1	298.297	172.207	0												Month
2007_IV		2	407	2						532				1.64467	10.339		Average (x̄)	2.2839									2.14061	3.25607			Month	19.4173	1	19.4173	11.2096	0.00104198												Year	2007
2007_V		3	214	5	87	2	2	18		54				1.09788	15.114		Median	1.8269									1.64467	2.79713			Year	88.2473	12	7.35394	4.24543	1.0241e-05												Year	2008
2007_VI		1	379	8	206		4	4		206				0.823867	18.45		Sample Standard Deviation (S)	1.5105									1.09788	2.34157			Error	245.973	142	1.7322														Year	2009
2007_VII	2	1	733	13	43		12	5		2174				0.602833	19.984		Sum of Squares	353.637									0.823867	1.29071																				Year	2010
2007_VIII			324	17	3		12	6		1805				0.577891	19.615		b	17.6261									0.602833	0.813522																				Year	2011
2007_IX			261	1	47			1		1361				0.852933	15.508		Skewness	1.2167									0.577891	0.576335																				Year	2012
2007_X			295		2			2		1695				1.38965	11.071												0.852933	1.02023																				Year	2013
2007_XI			12							16				3.68067	6.345												1.38965	1.23178																				Year	2014
2007_XII			2							2				2.39279	4.448	Water temperature (T; °C)		The Shapiro-Wilk tests showed a significance departure from the normality, W(156) = .927, p < .001									3.68067	2.05226																				Year	2015
2008_I														2.74564	3.979		P-value	3.946e-07									2.39279	2.37323																				Year	2016
2008_II														1.66256	4.239		W	0.9269									2.74564	2.09702																				Year	2017
2008_III		2	67							17				2.13912	5.334		Sample size (n)	156									1.66256	2.59212																				Year	2018
2008_IV		1	716							165				3.949	8.402		Average (x̄)	10.8338									2.13912	3.32699
2008_V		4	489		142					128				1.96948	11.32		Median	10.2295									3.949	2.86805
2008_VI	1	3	1563	34	248			5		817	1			1.55	16.78		Sample Standard Deviation (S)	5.6054									1.96948	2.41249
2008_VII		1	1225	29	24		2	2		296				1.08415	18.78		Sum of Squares	4870.18									1.55	1.36163
2008_VIII		1	501	8	3		13	1		2523				0.809721	19.58		b	67.1893									1.08415	0.88444
2008_IX			226	2	56		1	2		2844				0.785167	16.99		Skewness	0.1659									0.809721	0.647252
2008_X			169	2	12		1	1		986				1.12589	12.95												0.785167	1.09114
2008_XI			8							29				2.31033	8.13												1.12589	1.3027
2008_XII														4.60955	4.78												2.31033	2.12318
2009_I														2.28615	3.46												4.60955	2.44415
2009_II			3											4.155	3.95												2.28615	2.16794
2009_III			12											2.83027	4.78												4.155	2.66303
2009_IV			269							40				2.78533	9.59												2.83027	3.39791
2009_V			191		41		6	3		1				1.82836	15.32												2.78533	2.93897
2009_VI			1096	4	178		3	1		11				1.239	17.45												1.82836	2.4834
2009_VII			1307	14	35		15	1		460				0.958018	19.29												1.239	1.43255
2009_VIII			865	21	2		20	2		389				0.690239	20.33												0.958018	0.955357
2009_IX			846	7	82		21	1		436				0.607033	16.94												0.690239	0.71817
2009_X			125		5		1			29				0.644761	12.3916												0.607033	1.16206
2009_XI			11											0.939833	7.92663												0.644761	1.37362					1	2	3	4	5	6	7	8	9	10	11	12	13
2009_XII														2.80217	5.36577												0.939833	2.1941					2007	2008	2009	2010	2011	2012	2013	2014	2015	2016	2017	2018	2019
2010_I														4.10239	4.0729												2.80217	2.51507
2010_II														2.89433	2.78561												4.10239	2.23885
2010_III			15							4				4.20615	4.9039												2.89433	2.73395
2010_IV			199							23				4.01267	8.38807												4.20615	3.46883
2010_V		1	90		42		1	1						2.32615	11.7663												4.01267	3.00989
2010_VI			495	3	196					27				2.03333	14.9844												2.32615	2.55432
2010_VII	1	4	526	20	66		4	2		58	1			1.36209	17.8338												2.03333	1.50346
2010_VIII			359	19	3	1	2	2		51				1.00466	17.7364												1.36209	1.02628
2010_IX			259	5	19	2	3	1		316				1.27657	14.1931												1.00466	0.789088
2010_X			32		1					123				1.46697	10.3445												1.27657	1.23298
2010_XI			8							4				2.288	8.11513												1.46697	1.44453
2010_XII														3.60582	4.73761												2.288	2.26502
2011_I														2.27976	3.658												3.60582	2.58599
2011_II			3											1.86283	2.916												2.27976	2.30977
2011_III			4											1.96973	3.763												1.86283	2.80487
2011_IV			682					1		2				1.596	9.559												1.96973	3.53974
2011_V			205		48	1		12		12				1.285	12.785												1.596	3.08081
2011_VI			787		173			3		8	1			1.0955	17.142												1.285	2.62524
2011_VII	5	3	532		44					27	1			0.879494	19.327												1.0955	1.57438
2011_VIII	1		238		12	1	5	1		11				0.754479	19.591												0.879494	1.09719
2011_IX			104		1		1	2		20				0.681267	18.263												0.754479	0.860006
2011_X			61	1	2	1	1			8				0.709852	12.756												0.681267	1.3039
2011_XI			3		1					2				0.741167	7.87												0.709852	1.51545
2011_XII														1.02313	5.078												0.741167	2.33593
2012_I			3											0.988624	3.209												1.02313	2.6569
2012_II														0.780011	1.663												0.988624	2.38069
2012_III			9							1				1.57004	4.876												0.780011	2.87579
2012_IV			171							64				1.53833	9.167												1.57004	3.61066
2012_V			119		2		3	3		22				1.895	12.766												1.53833	3.15172
2012_VI		3	563		147			1		545	1	1		1.28947	17.902												1.895	2.69616
2012_VII	1	1	147		10	1	21			239				0.804573	20.063												1.28947	1.6453
2012_VIII		1	112		1	1	2	1		528		1		0.6539	20.019												0.804573	1.16811
2012_IX			85	2	3			1		565				0.846267	16.292												0.6539	0.930923
2012_X			34					1		202				0.976521	13.177												0.846267	1.37482
2012_XI			8							4				2.25967	8.911												0.976521	1.58637
2012_XII														3.23024	5.124												2.25967	2.40685
2013_I														3.81064	4.203												3.23024	2.72782
2013_II														3.44267	3.868												3.81064	2.45161
2013_III														5.75073	5.19												3.44267	2.94671
2013_IV			1478							119				6.62733	8.35												5.75073	3.68158
2013_V			149		72		1			4				2.38718	12.46												6.62733	3.22264
2013_VI		1	974	16	155		1			126				1.603	15.69												2.38718	2.76707
2013_VII	11	8	610	46	67		3	2		63		2	1	1.13479	18.3												1.603	1.71622
2013_VIII		1	203	32			5	3		168				0.877848	18.87												1.13479	1.23903
2013_IX			94	7	6			1		122			1	0.7597	15.82												0.877848	1.00184
2013_X			7		2					7				0.969718	12.3												0.7597	1.44573
2013_XI			3							6				3.27987	9.18												0.969718	1.65729
2013_XII														1.82539	4.69												3.27987	2.47777
2014_I														2.24806	5.465												1.82539	2.79874
2014_II			17											5.01143	5.296												2.24806	2.52253
2014_III			28							39				4.87645	6.96												5.01143	3.01762
2014_IV			204							70				3.622	9.365												4.87645	3.7525
2014_V			42		11			3						5.88968	10.93												3.622	3.29356
2014_VI			289	5	70	3	1	3		1				2.635	14.717												5.88968	2.83799
2014_VII	16	4	562	10	17	2	6	1	1	217	4			2.56677	17.43												2.635	1.78714
2014_VIII	2	3	1034	37	1			3		755	1	1		2.85355	15.17												2.56677	1.30995
2014_IX			821	11	5			2		812				7.66033	11.28												2.85355	1.07276
2014_X			367	52		1	1			928				5.43548	10.47												7.66033	1.51665
2014_XI			54	7			1			57				4.33133	8.32												5.43548	1.7282
2014_XII			43	3						75				3.48387	6.007												4.33133	2.54869
2015_I														2.93097	3.942												3.48387	2.86966
2015_II														4.48107	3.387												2.93097	2.59344
2015_III			104							2				4.62065	5.903												4.48107	3.08854
2015_IV			3063	3				8		34				4.59233	8.504												4.62065	3.82341
2015_V			867	7	19	1	5	22		2				2.88581	12.939												4.59233	3.36448
2015_VI		3	2283	26	391	2		6		2	2			1.85467	15.999												2.88581	2.90891
2015_VII	59	12	2322	3	40	3	32	6		11	1	1		1.18323	19.714												1.85467	1.85805
2015_VIII		3	835	7	3	1	1	4		26			5	0.931355	18.957												1.18323	1.38086
2015_IX			350	3	46	1	2	3		13				1.07443	16.075												0.931355	1.14368
2015_X			122	3	9					17				4.20935	10.356												1.07443	1.58757
2015_XI			16	1	1					23				2.15667	7.684												4.20935	1.79912
2015_XII														2.11774	5.061												2.15667	2.6196
2016_I														2.21806	3.672												2.11774	2.94057
2016_II			1							1				3.85	5.21												2.21806	2.66436
2016_III			17							3				5.49677	6.08												3.85	3.15946
2016_IV			346							11				2.59367	9.69416												5.49677	3.89433
2016_V			337	2	31			1		19				4.56355	10.9634												2.59367	3.43539
2016_VI		3	909	32	129			8		566	1			2.44833	15.2217												4.56355	2.97983
2016_VII	18	5	509	31	46		3	1		402				1.44516	18.4436												2.44833	1.92897
2016_VIII	2	4	643	51	8		1	17		52				1.08416	17.5547												1.44516	1.45178
2016_IX			375	12	13		1	12		15				1.22203	16.2886												1.08416	1.21459
2016_X			132	10						101				1.61903	10.9217												1.22203	1.65849
2016_XI			22	10						44				3.88733	7.94275												1.61903	1.87004
2016_XII														1.73161	4.91847												3.88733	2.69052
2017_I														1.33613	1.84823												1.73161	3.01149
2017_II														2.615	3.56558												1.33613	2.73528
2017_III		1	153							1				3.72226	6.85812												2.615	3.23038
2017_IV			263							11				1.67033	9.79034												3.72226	3.96525
2017_V			168		20					6				1.73161	12.9												1.67033	3.50631
2017_VI	1	2	801	23	152									1.23133	18.16												1.73161	3.05075
2017_VII	26	2	652	9	14		1	3		127	1			0.907226	20.07												1.23133	1.99989
2017_VIII	1	1	112	1	2	2		4		9				0.775516	20.07												0.907226	1.5227
2017_IX			95		2			3		68				1.3117	15.29												0.775516	1.28551
2017_X			87					1		158				1.28	11.4												1.3117	1.7294
2017_XI			18	2	1					6				2.464	7.74												1.28	1.94096
2017_XII														5.0729	5.1												2.464	2.76144
2018_I			25											4.17194	5.3												5.0729	3.08241
2018_II														3.54536	3.77												4.17194	2.8062
2018_III			29							6				7.33774	3.92												3.54536	3.30129
2018_IV			938					1		131				5.52267	9.88												7.33774	4.03617
2018_V			983	8	200			8		72				2.58226	13.81												5.52267	3.57723
2018_VI	2		536	26	42			5	2	15				1.84733	16.25												2.58226	3.12166
2018_VII	6		193	13	6			1		84				1.79903	17.33												1.84733	2.07081
2018_VIII			173	7	1			2		5				1.10961	18.84												1.79903	1.59362
2018_IX			553	4	13					15				0.9201	16.43												1.10961	1.35643
2018_X			264	6						10				0.919484	12.13												0.9201	1.80032
2018_XI			12	1						11				1.14213	9.63												0.919484	2.01187
2018_XII														1.43839	5.19												1.14213	2.83236
2019_I														1.12	2.86												1.43839	3.15333
2019_II			14											2.19	3.63												1.12	2.87711
2019_III			12			1				2				1.2	6.21												2.19	3.37221
2019_IV			58							197				1.74	9.01												1.2	4.10708
2019_V			113	1	9					3				5.53	10.12												1.74	3.64815
2019_VI			395		111	1	1	3		34	1			2.66	15.9												5.53	3.19258
2019_VII	3	4	234	11	17	1		4		131				1.38	18.55												2.66	2.14172
2019_VIII			407	6	1			2		38				0.901	19.08												1.38	1.66453
2019_IX			983	4	8			3		58	1			0.797	15.95												0.901	1.42735
2019_X			1067	4						161				0.798	13.25												0.797	1.87124
2019_XI			20											2.73	9.57												0.798	2.08279
2019_XII			15							1				3.05	6.49												2.73	2.90328
																											3.05	3.22425
[truncated: 9 more columns]

## Sheet: SuppInfo_BKM
Year_Month/Family/Water properties	Athericidae	Ceratopogonidae	Chironomidae	Culiicidae	Dixidae	Empididae	Ephydridae	Limoniidae	Muscidae	Psychodidae	Scatophagidae	Sciomyzidae	Simulidae	Stratiomyidae	Syrphidae	Tipuliidae	Discharge (Q; m3 s-1)	Water temperature (T; °C)	Discharge (Q; m3 s-1)		The Shapiro-Wilk tests showed a significance departure from the normality, W(156) = .888, p < .001									RESULTS FROM THE GLMM:
2007_I																	1.70518	3.67		P-value	1.823e-09									Discharge	Discharge Predicted		Effect	Univariate Tests of Significance for Discharge (Spreadsheet1) Sigma-restricted parameterization Effective hypothesis decomposition; Std. Error of Estimate: 1,6204															Effect
2007_II																	1.93042	4.62		W	0.8885									1.70518	2.31784			SS	Degr. of	MS	F	p
2007_III													1				2.73894	6.442		Sample size (n)	156									1.93042	3.02827		Intercept	518.583	1	518.583	197.511	0											Month
2007_IV		1	268		1								1193				2.15767	10.738		Average (x̄)	2.9417									2.73894	3.87507		Month	39.3322	1	39.3322	14.9803	0.000165072											Year
2007_V		1	139		2	73				1			2984				1.27309	16.242		Median	2.444									2.15767	3.50345		Year	174.153	12	14.5127	5.5274	1.07141e-07											Year
2007_VI		4	329		7	109							3939				0.937667	19.706		Sample Standard Deviation (S)	1.9449									1.27309	3.22088		Error	372.835	142	2.6256													Year
2007_VII		3	255	5	1	7			4	3			1624				0.778324	21.85		Sum of Squares	586.327									0.937667	1.72499																		Year
2007_VIII		3	70		3	3			2	2			478				0.905297	21.653		b	22.8238									0.778324	0.935923																		Year
2007_IX			110		1	14				1			3692				1.14607	18.687		Skewness	1.0785									0.905297	0.628895																		Year
2007_X		2	72			2				1			573				1.48157	14.404												1.14607	1.05223																		Year
2007_XI			2										65				4.00033	8.307												1.48157	1.17557																		Year
2007_XII																	3.26336	4.955	Water temperature (T; °C)		The Shapiro-Wilk tests showed a significance departure from the normality, W(156) = .921, p < .001									4.00033	2.2327																		Year
2008_I													4				3.28797	3.162		P-value	1.684e-07									3.26336	2.79758																		Year
2008_II			2														2.0897	3.405		W	0.9215									3.28797	2.44016																		Year
2008_III													1				2.711	4.685		Sample size (n)	156									2.0897	3.15059																		Year
2008_IV			88										294				4.97533	8.756		Average (x̄)	12.2386									2.711	3.99739
2008_V		1	444			15		1					412				2.66909	12.03		Median	12.095									4.97533	3.62577
2008_VI		1	753		7	56							3510		1		2.08033	17.56		Sample Standard Deviation (S)	6.6539									2.66909	3.3432
2008_VII		9	471		9	2							318				1.27594	20.76		Sum of Squares	6862.6									2.08033	1.84731
2008_VIII			140	1	14	2		1					482				0.940388	21.23		b	79.5226									1.27594	1.05825
2008_IX			68		10	16			3	3			605				0.908433	20.12		Skewness	0.04104									0.940388	0.751217
2008_X			23		2	1			1				436				1.14258	16.28												0.908433	1.17455
2008_XI			14			4				1			7				2.36467	10.46												1.14258	1.29789
2008_XII													1				5.15385	5.23												2.36467	2.35502
2009_I																	3.12718	2.92645												5.15385	2.9199
2009_II													7				4.78075	3.23536												3.12718	2.56249
2009_III			1										88				3.56912	4.55155												4.78075	3.27291
2009_IV		1	82										1046				3.55233	9.75903												3.56912	4.11972
2009_V			41			27				1			9				2.42721	15.7491												3.55233	3.74809
2009_VI		1	274			104							460				1.43733	18.2194												2.42721	3.46553
2009_VII			166			2			1				11				1.03594	21.1556												1.43733	1.96963
2009_VIII			64		16								44				0.757267	22.2847												1.03594	1.18057
2009_IX			27			1			1	7			7				0.6781	19.8248												0.757267	0.87354
2009_X			20		1					2			134				0.749967	15.5225												0.6781	1.29687
2009_XI			61										109				1.02797	10.2403												0.749967	1.42022
2009_XII																	2.76594	6.72945												1.02797	2.47734
2010_I																	4.71955	3.50352												2.76594	3.04222
2010_II																	3.53117	1.91925												4.71955	2.68481
2010_III			2														5.10133	4.56												3.53117	3.39524
2010_IV		1	57										52				5.00667	8.58												5.10133	4.24204
2010_V			9			84											3.36252	12.67												5.00667	3.87042
2010_VI			256			100		1		1			157				3.121	16.01												3.36252	3.58785
2010_VII			172		2	2		1		2			178				2.0363	18.92												3.121	2.09195
2010_VIII			85		2	1				4			8				1.42603	18.77												2.0363	1.30289
2010_IX			22			3			3	5			110				1.5482	17.23												1.42603	0.995863
2010_X			7							1			75				1.56194	13.45												1.5482	1.4192			1	2	3	4	5	6	7	8	9	10	11	12	13
2010_XI			2										8				2.243	10.67												1.56194	1.54254			2007	2008	2009	2010	2011	2012	2013	2014	2015	2016	2017	2018	2019
2010_XII																	3.73548	6.11												2.243	2.59966
2011_I																	2.50921	3.035												3.73548	3.16455
2011_II			2														2.12283	2.806												2.50921	2.80713
2011_III																	2.07342	3.247												2.12283	3.51756
2011_IV			178										931				1.92133	10.208												2.07342	4.36436
2011_V		1	154		2	18		1	1	36			1063				1.69688	14.264												1.92133	3.99274
2011_VI			273		2	118			1	8			845	1		3	1.39833	19.057												1.69688	3.71017
2011_VII			265		5	29			6	4			287				1.13788	21.447												1.39833	2.21428
2011_VIII			20		3	7			2	2			8				0.965906	21.735												1.13788	1.42521
2011_IX			21			6			1	4			53			1	0.819233	21.17												0.965906	1.11819
2011_X			5			1							293				0.775773	15.721												0.819233	1.54152
2011_XI																	0.6886	10.315												0.775773	1.66486
2011_XII																	0.984864	6.674												0.6886	2.72199
2012_I		1	2			1					1						1.18587	4.268												0.984864	3.28687
2012_II																	1.02778	1.673												1.18587	2.92946
2012_III			3														1.69815	4.811												1.02778	3.63988
2012_IV			6										6				1.91	9.666												1.69815	4.48668
2012_V			22			6				8			9				2.46067	14.315												1.91	4.11506
2012_VI	1	1	228		7	93		2	3	3			831				1.711	19.839												2.46067	3.8325
2012_VII			18		1	7			4	1			195				1.07872	22.683												1.711	2.3366
2012_VIII			9		1				1				269				0.853676	22.499												1.07872	1.54754
2012_IX			16						1	5			812	1			1.13353	19.466												0.853676	1.24051
2012_X			27										563				1.09888	16.028												1.13353	1.66384
2012_XI		1	10					1					38				2.46267	11.298												1.09888	1.78718
2012_XII			1														4.20764	6.241												2.46267	2.84431
2013_I																	5.29558	4.007												4.20764	3.40919
2013_II			1		1	1											4.77558	2.984												5.29558	3.05178
2013_III			6										1				6.42352	4.37												4.77558	3.7622
2013_IV			54										265				8.27767	8.18												6.42352	4.60901
2013_V			174		1	110				2			1192				4.34255	14.56												8.27767	4.23738
2013_VI		1	715		1	139		3	2	1			1928	1		1	2.68867	17.83												4.34255	3.95482
2013_VII		1	216		3	17				1			216	1			1.62539	20.76												2.68867	2.45892
2013_VIII			43		1					6			218				1.20721	22.08												1.62539	1.66986
2013_IX			41		2	12				5			223				1.02487	18.93												1.20721	1.36283
2013_X			5			1		1		1			136				1.10608	14.83												1.02487	1.78616
2013_XI			2		1								25				4.14127	11.41												1.10608	1.90951
2013_XII			2														3.07921	5.59												4.14127	2.96663
2014_I																	2.56194	5.313												3.07921	3.53152
2014_II																	6.6125	4.62												2.56194	3.1741
2014_III			11										15				6.72194	6.536												6.6125	3.88453
2014_IV			38										422				5.409	10.157												6.72194	4.73133
2014_V			3			1							4				8.12839	12.44												5.409	4.35971
2014_VI		2	27		2	101			2	1			429				4.01833	17.22												8.12839	4.07714
2014_VII	1		237		5	4				1			760	2			3.3	20.047												4.01833	2.58125
2014_VIII		4	174		3	2		1	3	3			648				4.0371	19.302												3.3	1.79218
2014_IX			19		2			1	3				260				8.79367	14.82												4.0371	1.48515
2014_X			84		30				2				400				6.60645	12.76												8.79367	1.90849
2014_XI			23		15								14				5.80967	9.43												6.60645	2.03183
2014_XII			8		1								5				4.99581	6.36												5.80967	3.08896
2015_I																	4.15484	3.67												4.99581	3.65384
2015_II			7										6				6.54143	2.56												4.15484	3.29642
2015_III			7														5.81194	5.23												6.54143	4.00685
2015_IV			374		3			1			2		89				5.677	8.97												5.81194	4.85365
2015_V			244		6	43			14				13				4.12097	14.23												5.677	4.48203
2015_VI		2	684		54	323		3	11				617				2.95867	18.02												4.12097	4.19946
2015_VII			306		21	55			3	1			7				1.78226	21.87												2.95867	2.70357
2015_VIII		1	330		2	23				4			19				1.31806	20.98												1.78226	1.91451
2015_IX			53		5	12							15				1.39153	19.03												1.31806	1.60748
2015_X			10			2							44				4.90516	12.58												1.39153	2.03081
2015_XI			2		2								22				2.97867	8.97												4.90516	2.15415
2015_XII																	2.78677	5.099												2.97867	3.21128
2016_I																	2.90806	3.51												2.78677	3.77616
2016_II			5														4.91793	4.56												2.90806	3.41875
2016_III			1										2				7.47419	5.67												4.91793	4.12917
2016_IV			47		2								298				3.84067	10.4748												7.47419	4.97598
2016_V			45		1	20		8					223		1		6.17	12.3288												3.84067	4.60435
2016_VI			131		4	53		1		1			2439				3.47467	17.8882												6.17	4.32179
2016_VII			128		12	15		9		1			75				2.10129	21.39												3.47467	2.82589
2016_VIII			141		13	4							20				1.64452	20.9959												2.10129	2.03683
2016_IX		1	63		3	3				1			46				1.57467	19.6273												1.64452	1.7298
2016_X			17		7					1			70				1.86	14.3358												1.57467	2.15313
2016_XI			9										12				4.621	9.81428												1.86	2.27648
2016_XII																	2.41258	5.90032												4.621	3.3336
2017_I																	1.98161	2.20523												2.41258	3.89848
2017_II													1				3.75321	2.82177												1.98161	3.54107
2017_III			10										2				5.81129	6.10653												3.75321	4.2515
2017_IV			204										233				2.51467	10.5109												5.81129	5.0983
2017_V			150			6				2			39				2.88129	14.29												2.51467	4.72668
2017_VI			116		4	63		2				1	160				1.872	19.99												2.88129	4.44411
2017_VII	2		56		3	8		2					26				1.26613	22.43												1.872	2.94821
2017_VIII			83		5	11		1		1			43				0.977161	22.95												1.26613	2.15915
2017_IX			2		1								76				1.7905	18.78												0.977161	1.85212
2017_X			26		1								566				1.41065	14.51												1.7905	2.27546
2017_XI			2		1								76				3.199	10.01												1.41065	2.3988
2017_XII			5										1				6.94355	5.46												3.199	3.45592
2018_I			2														4.85613	4.42												6.94355	4.02081
2018_II																	4.06536	3.21												4.85613	3.66339
2018_III			6														8.19226	3.31												4.06536	4.37382
2018_IV			100							1			233				7.62367	10.2												8.19226	5.22062
2018_V			491		2	72		1		1			1645				3.59	15.98												7.62367	4.849
2018_VI		1	125		13	22	2			1			217	4			2.758	19.41												3.59	4.56643
2018_VII	2		60		10	15				1			228				2.54	20.27												2.758	3.07054
2018_VIII		1	62		9	43			2				575				1.48419	22.48												2.54	2.28147
2018_IX			26		4	13				2			303				1.23133	19.79												1.48419	1.97445
2018_X			51		3	37			1	2			114				1.08455	15.25												1.23133	2.39778
2018_XI			7		6	4			1				11				1.2394	12.16												1.08455	2.52112
2018_XII													1				1.63065	6.92												1.2394	3.57825
2019_I																	1.38	3.68												1.63065	4.14313
2019_II			7		1					1			1				2.76	3.54												1.38	3.78571
2019_III			8										1				1.59	5.89												2.76	4.49614
2019_IV			86							5			853				2.22	9.78												1.59	5.34294
2019_V			8		1					2			24				8.29	11.53												2.22	4.97132
2019_VI			215		4	94		3		3			2476	1			3.51	18.82												8.29	4.68876
2019_VII	1		347		20	14			1	3			1262				1.75	21.63												3.51	3.19286
2019_VIII			97		33	12		10	2	1			714				1.2	22.37												1.75	2.4038
2019_IX			49		17	6				3			273				1.18	19.74												1.2	2.09677
2019_X			76			4							91				1.04	16.26												1.18	2.5201
2019_XI			4		4	2							81				3.79	12.29												1.04	2.64344
2019_XII													22				3.95	7.97												3.79	3.70057
																														3.95	4.26545
[truncated: 10 more columns]
